# Supplementary material for: IL-6 promotes PD-L1 expression in monocytes and macrophages by decreasing protein tyrosine phosphatase receptor type O expression in human hepatocellular carcinoma
Source: PubMed Central journal article supplement (PMC7319788; doi:10.1136/jitc-2019-000285), 2020-06-24
Supplement: jitc-2019-000285supp001.pdf [file jitc-2019-000285supp001.pdf]

**IL-6 promotes PD-L1 expression in monocytes and macrophages by decreasing protein tyrosine phosphatase receptor type O expression in human hepatocellular carcinoma**

**Supplementary materials**

**Supplementary Table 1 The clinicopathological relevance analysis of monocyte PTPRO expression in HCC patients.**

| Variable                     | Monocyte PTPRO |      | P value*          |
|------------------------------|----------------|------|-------------------|
|                              | Low            | High |                   |
| <b>All cases</b>             | 82             | 83   |                   |
| <b>Age</b>                   |                |      | <b>0.0081</b>     |
| <60                          | 32             | 50   |                   |
| ≥60                          | 50             | 33   |                   |
| <b>Gender</b>                |                |      | 0.872             |
| Male                         | 52             | 51   |                   |
| Female                       | 30             | 32   |                   |
| <b>HBV</b>                   |                |      | <b>&lt;0.0001</b> |
| Positive                     | 43             | 68   |                   |
| Negative                     | 39             | 15   |                   |
| <b>Differentiation grade</b> |                |      | 0.358             |
| Well                         | 23             | 32   |                   |
| Moderate                     | 32             | 28   |                   |
| Poorly                       | 27             | 23   |                   |
| <b>Tumor Size(cm)</b>        |                |      | <b>&lt;0.0001</b> |
| ≤5cm                         | 20             | 67   |                   |
| >5cm                         | 62             | 16   |                   |
| <b>Tumor Number</b>          |                |      | <b>0.0002</b>     |
| Solitary                     | 57             | 34   |                   |
| Multiple                     | 25             | 49   |                   |

\* Data was analyzed by chi-squared test. P value in bold indicated statistically significant.

**Supplementary Table 2: Primers used in the experiments**

| Gene          | Primer sequence (5'-3') | Amplicon size |
|---------------|-------------------------|---------------|
| <b>Human</b>  |                         |               |
| PTPRO         | ATGACTTCAGCCGTGTGAGAT   | 111           |
|               | GGGTGGCAATATACTCCTGGG   |               |
| CD274 (PD-L1) | TGGCATTGCTGAACGCATTT    | 120           |
|               | TGCAGCCAGGTCTAATTGTTTT  |               |
| <b>Mouse</b>  |                         |               |
| Ptpro         | GCACACTTTTAATTGGACTGCTC | 87            |
|               | TGCCAGCTCCACATTCCCTA    |               |
| Cd274 (pd-L1) | AGTATGGCAGCAACGTCACG    | 88            |
|               | TCCTTTTCCCAGTACACCACTA  |               |

**Supplementary table 3. Information of Antibodies used for flowcytometry analysis**

| Gene         | Manufacturer  | Antibody                                               | Clone |
|--------------|---------------|--------------------------------------------------------|-------|
| <b>Mouse</b> |               |                                                        |       |
| Pd-L1        | BD Bioscience | BD Pharmingen™<br>APC Rat Anti-Mouse<br>CD274          | MIH5  |
| Tim3         | BD Bioscience | BD Pharmingen™ PE<br>Mouse Anti-Mouse<br>CD366 (TIM-3) | 5D12  |

|               |               |                                                                |        |
|---------------|---------------|----------------------------------------------------------------|--------|
| Ifn- $\gamma$ | BD Bioscience | BD Pharmingen™<br>APC Rat Anti-Mouse<br>IFN- $\gamma$          | XMG1.2 |
| F4/80         | Biolegend     | FITC anti-mouse<br>F4/80 Antibody                              | BM8    |
| <b>Human</b>  |               |                                                                |        |
| CD68          | BD Bioscience | BD Pharmingen™<br>FITC Mouse Anti-<br>Human CD68               | Y1/82A |
| TIM3          | BD Bioscience | BD Horizon™ PE-<br>CF594 Mouse Anti-<br>Human TIM-3<br>(CD366) | 7D3    |
| PD-L1         | BD Bioscience | BD Horizon™ PE-<br>CF594 Mouse Anti-<br>Human CD274            | MIH1   |
| CD14          | BD Bioscience | BD Pharmingen™<br>Alexa Fluor® 488<br>Mouse Anti-Human<br>CD14 | M5E2   |

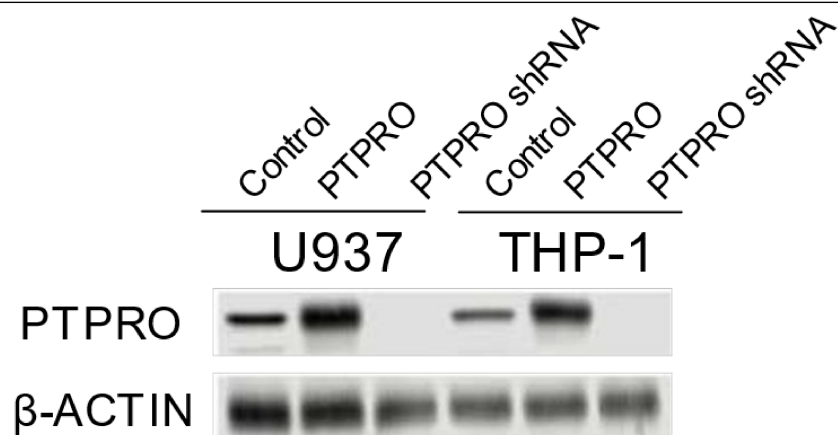

Figure s1: The protein was extracted from cells indicated in the figure and the expression of PTPRO was detected by western-blot.

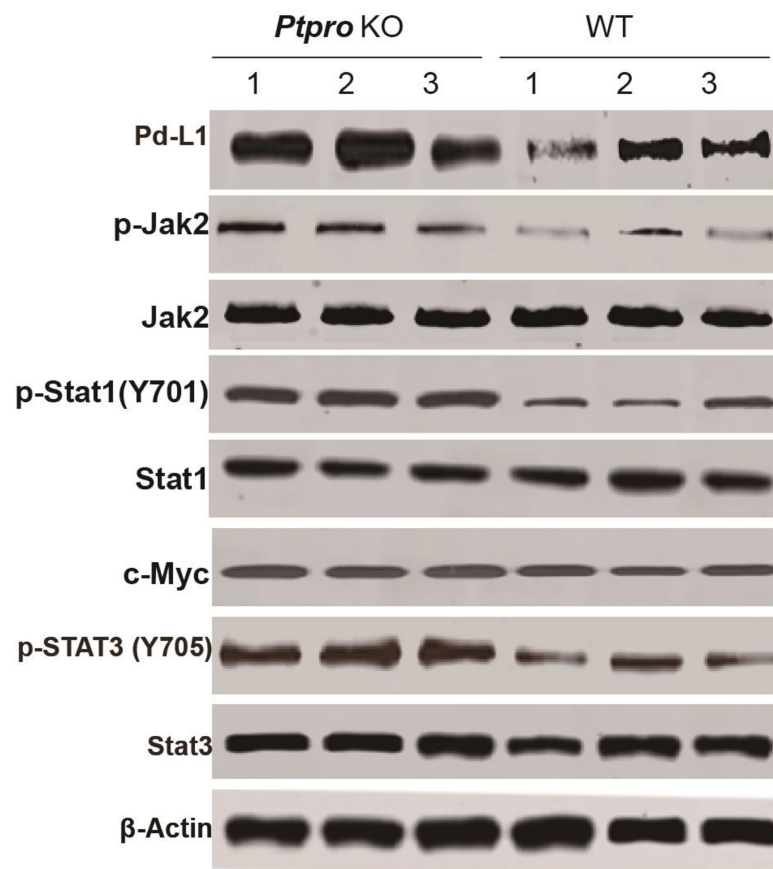

Figure s2: The expression of Pd-L1 as well as Jak2/Stat1 and Jak2/Stat3/c-Myc signaling were detected by western-blot in WT and *Ptpro* KO mice.

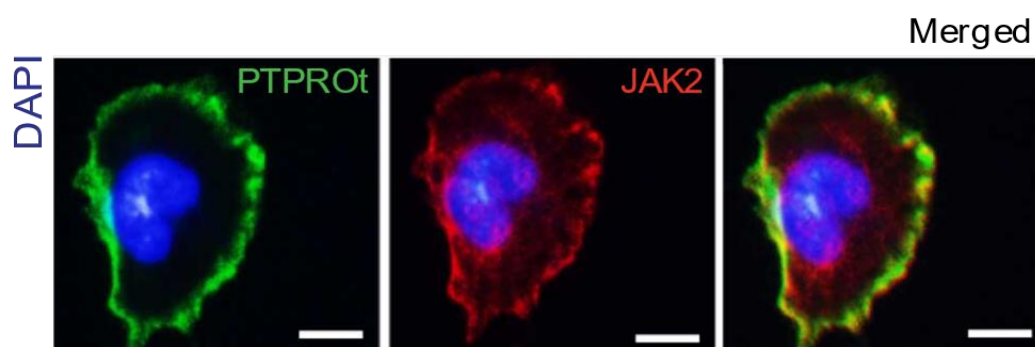

Figure s3: The localization of PTPRO and JAK2 were detected by IF staining ( $\times 400$ ).

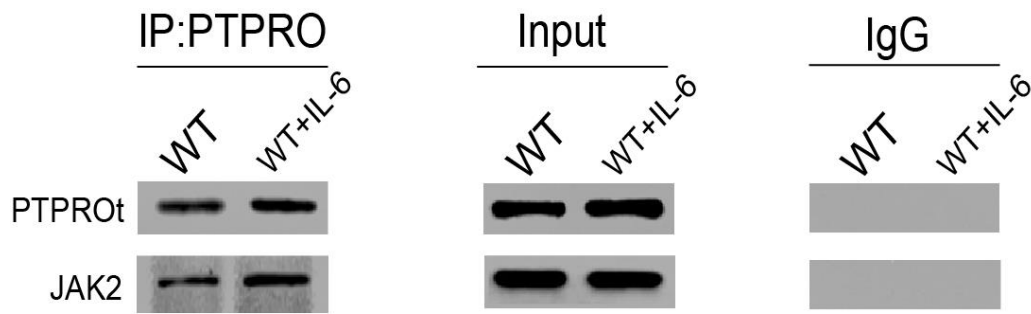

Figure s4: A co-IP assay was performed in macrophage from WT mice treated with or without IL-6 (50ng/mL) by PTPRO antibody, and further detected by using PTPRO and JAK2.

```

agccatatgggtctgctgacttttatatgtgtagagtatatcaagttatgtcaagatgttcagtcacctga
agaggctttatcagaaaaggggacgccttctgataaaggtaaggggtaaccttaagctcttaccctctg
aaggtaaaatcaaggcgcttcagatgttgctgtgtaaattctttttataataacataactaaatgtggatt
gcttaactctcgaaactctccgggaaaaatctcattcaagaaaaactggactgacatgttcacttctgttc
atctctatacacagctttatcctagacaccaacactagatacctaaactgaaagctccgccgattcaccg
aaggtcaggaaagtccaacgcccgcaaaactggattgctgcttgggcagagggtggcgggacccccgc
ctccggcctggcgcaacgctgagcagctggcgctcccgcgggcccATGAGGATATTTGCT
GTCTTTATA...
Stat1/STAT3 binding site
Stat2/STAT5 binding site
ATG transcription starting site
    
```

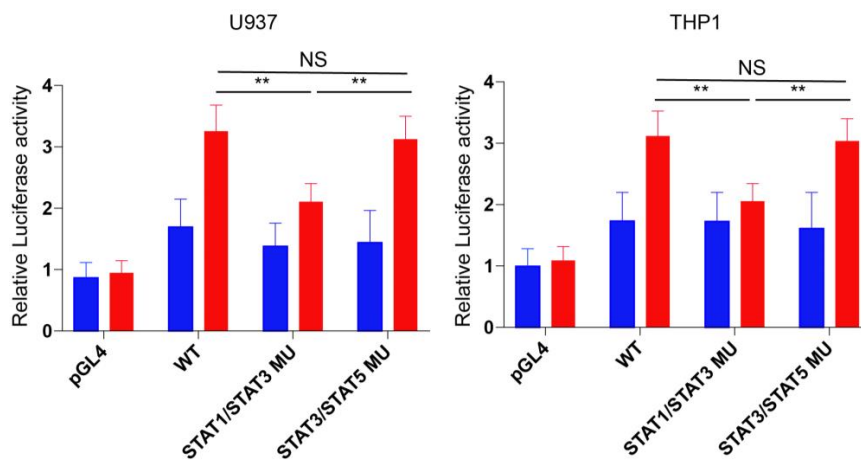

Figure s5. Sequence of human PD-L1 promoter (-500) showing the position of the most representative putative binding sites of STAT1/STAT3, STAT2/STAT5 (upper panel), Luciferase gene reporter assay reflecting promoter activity of PD-L1 treated differently indicated in the figure (Lower panel).

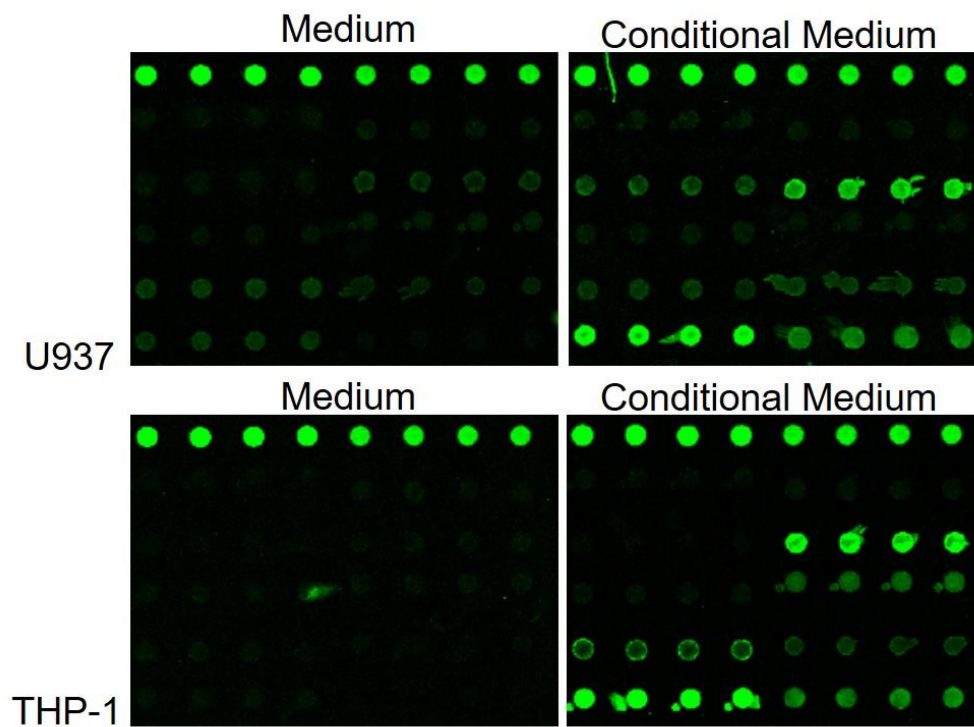

Figure s6: The secretory cytokines detection by human inflammatory array Q1 in the culture supernatant from U937- and THP-1- derived macrophage treated with control and tumor conditional medium.

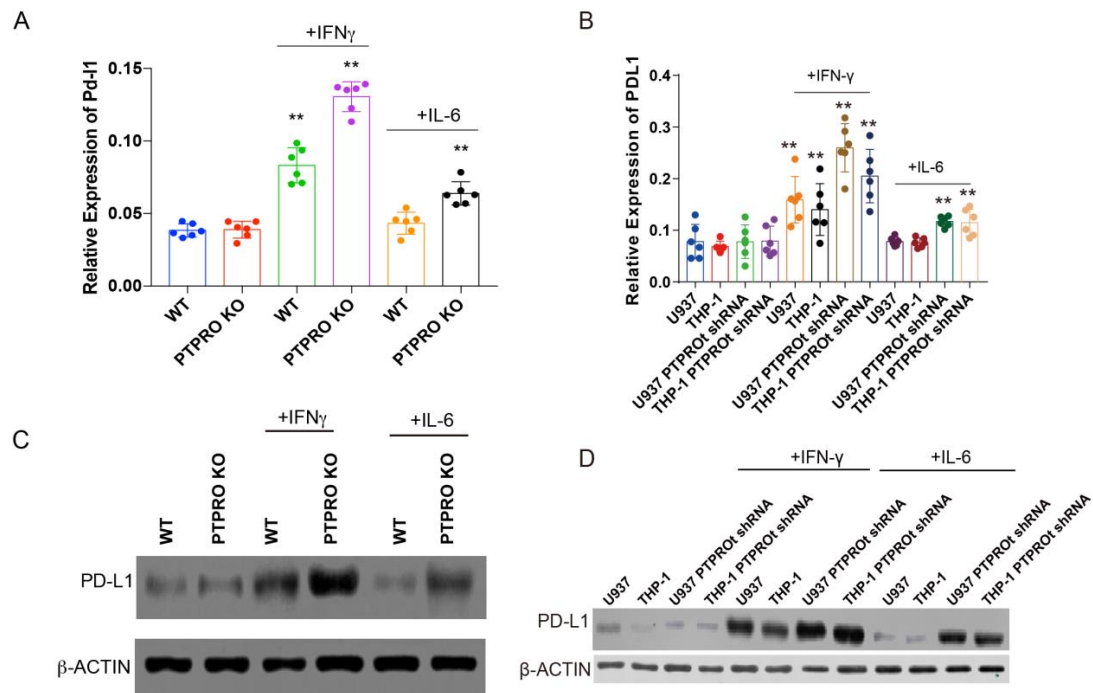

Figure s7: A and B: Macrophages extracted from WT and PTPRO KO mice and human macrophage derived from U937 and THP-1 were treated with IL-6 and IFN- $\gamma$ , the transcription of Pd-L1/PD-L1 was detected by real-time PCR. \*\*,  $P < 0.01$ , compared to its no treatment control, by Student's t-test. C and D: Macrophages extracted from WT and PTPRO KO mice and human macrophage derived from U937 and THP-1 were treated with IL-6 and IFN- $\gamma$  respectively, the protein expression was detected by using western-blot.



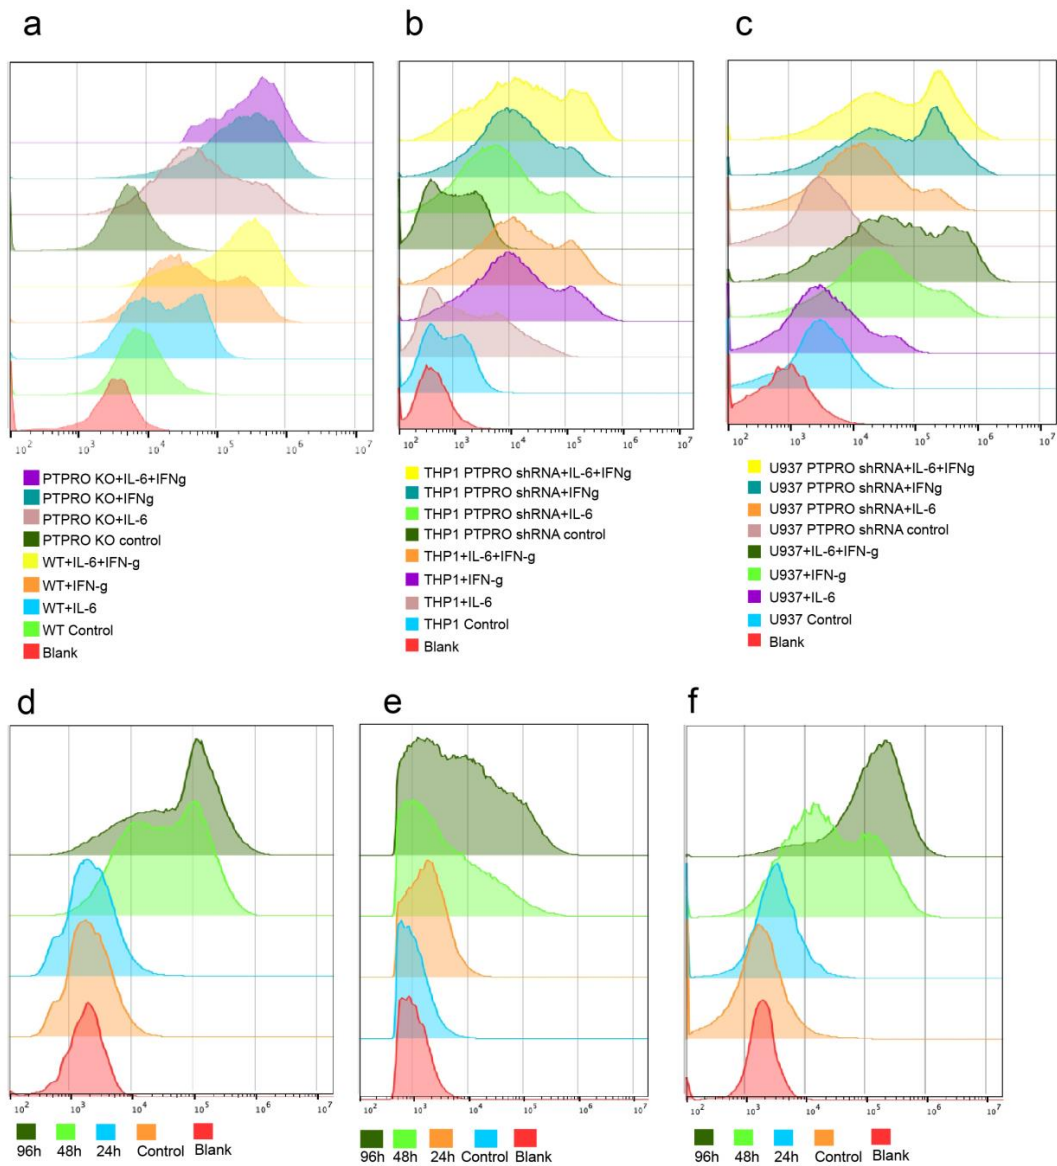

Figure s8. Detection of surface PD-L1 expression in macrophage

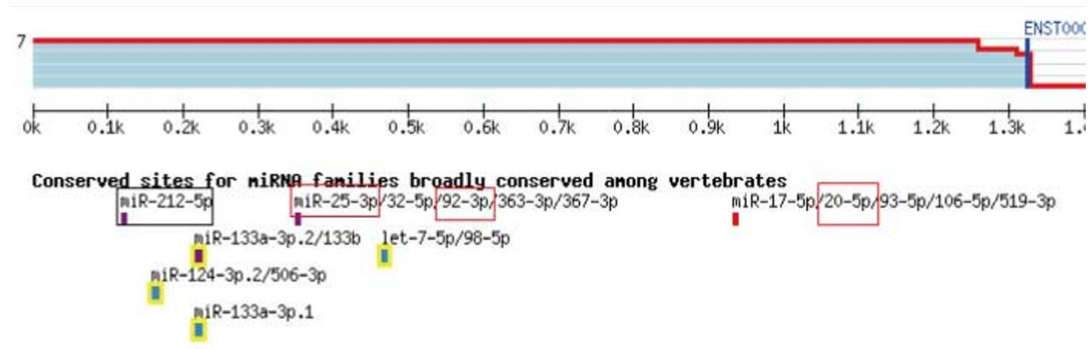

Figure s9: The potential binding sites of miR-25-3p in 3'UTR of PTPRO were predicted by Targetscan.

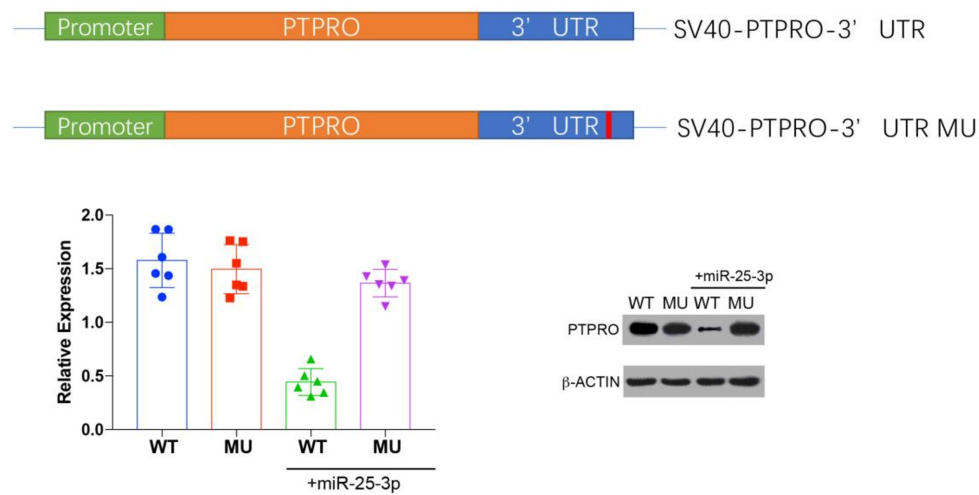

Figure 10. The effect of miR-25-3p on the transcription and protein expression of PTPRO in macrophage.

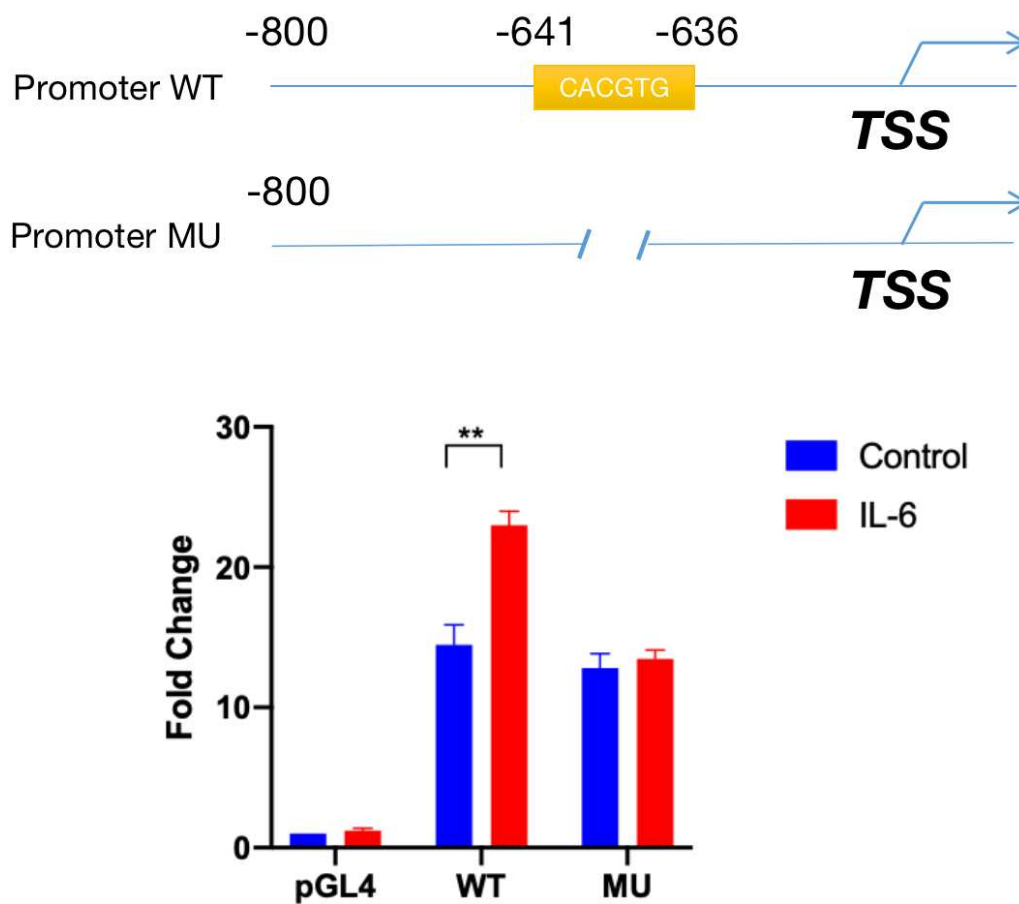

Figure s11 Upper: Schematic representations of genomic regulatory regions of the miR-106b ~25 clusters containing putative c-Myc binding sites. Lower: Luciferase gene reporter assay was carried out reflecting the promoter activity of miR-106b-25 cluster. Error bars represent standard errors from three independent experiments, each conducted in triplicate. \*\*, significantly different ( $P < 0.01$ ).

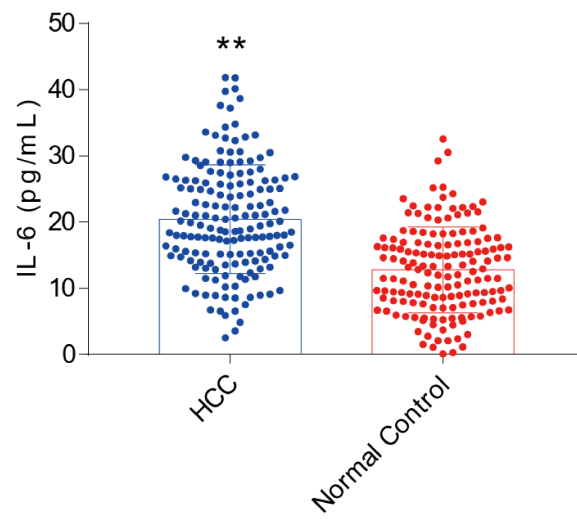

Figure s12: The serum IL-6 of 165 HCC patients and 155 healthy controls were detected by ELISA. \*\*,  $P < 0.01$ , compared to Normal control, by Student's t-test.

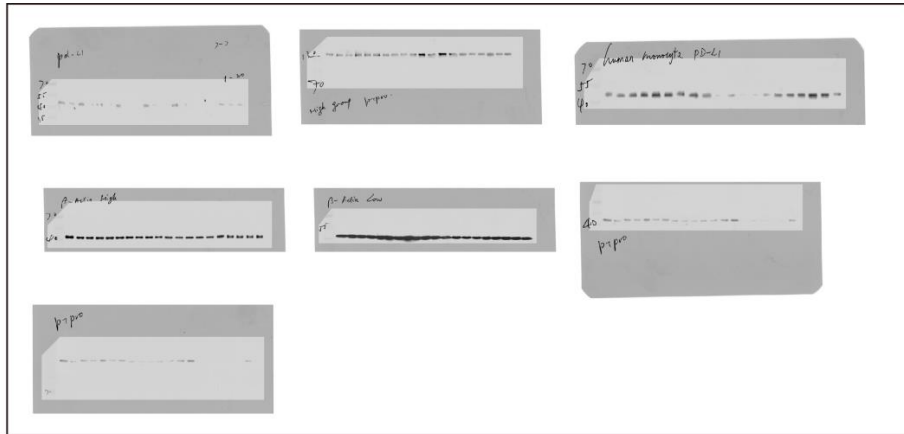

figure 2a

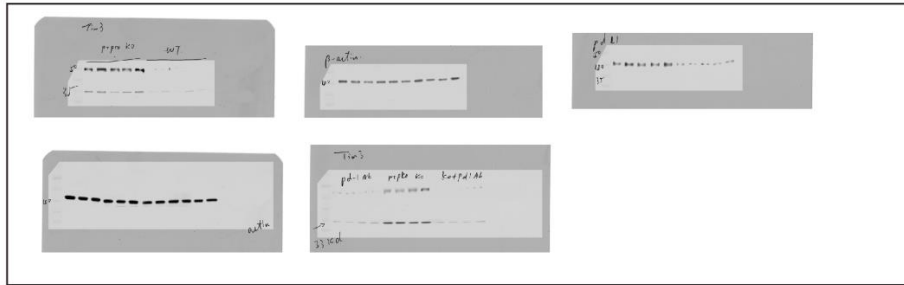

figure 2l

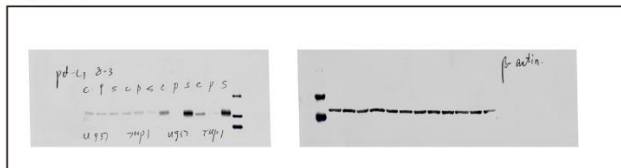

figure 3a

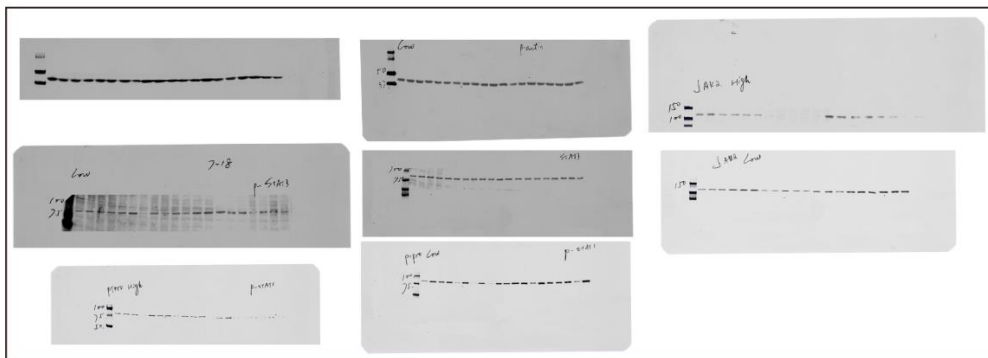

Figure 3b part 1

Uncropped figure of WB

Figure s13

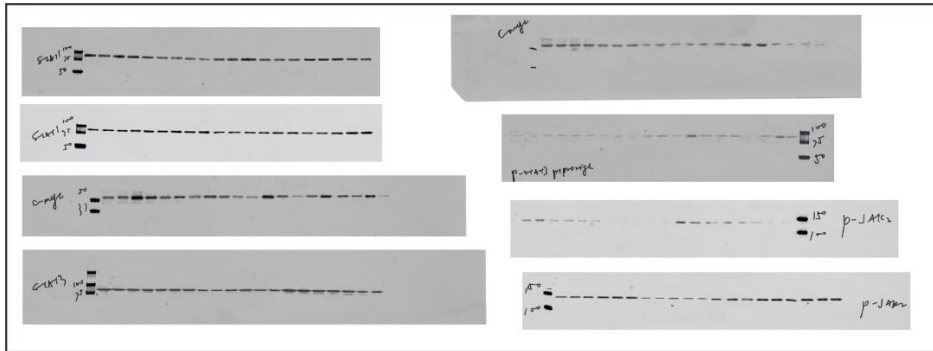

Figure 3b part 2

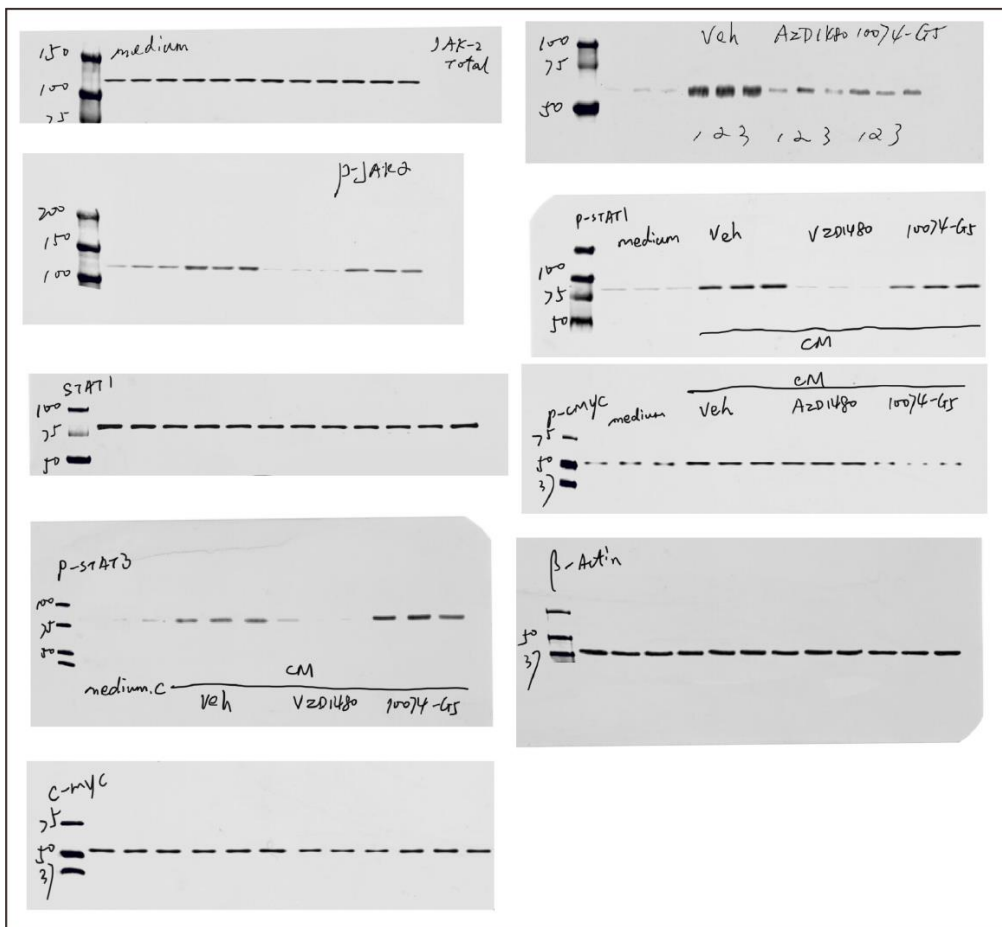

Figure 3d

Uncropped figure of WB

Figure s14

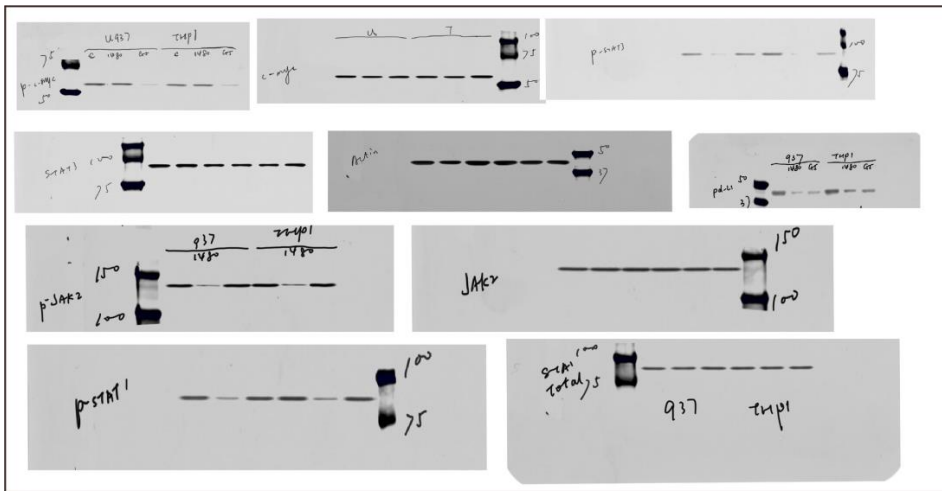

Figure 3f

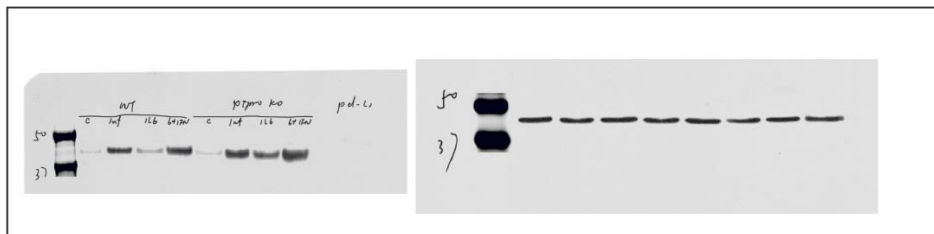

Figure 4a

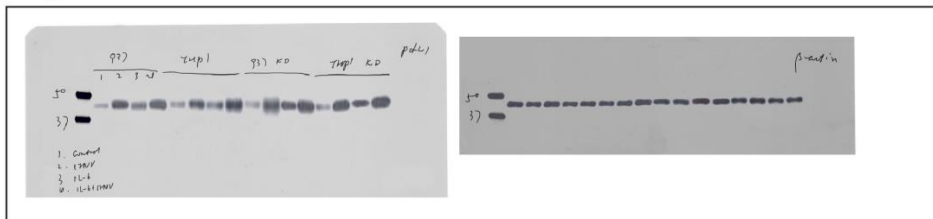

Figure 4b

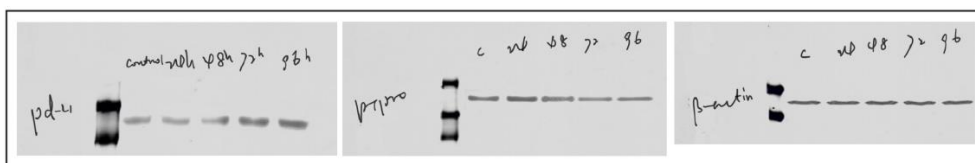

Figure 4c

Uncropped figure of WB

Figure s15

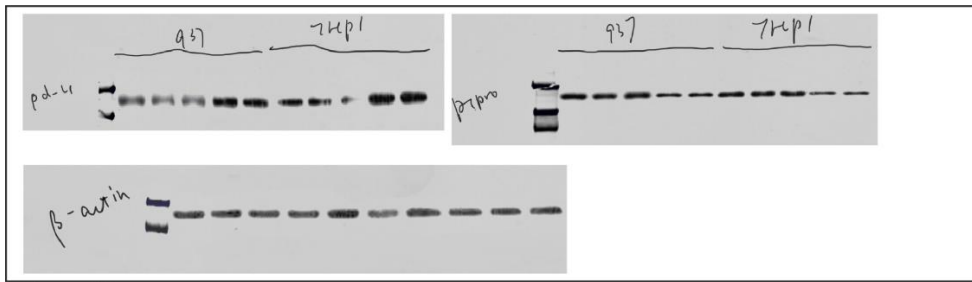

Figure 4d

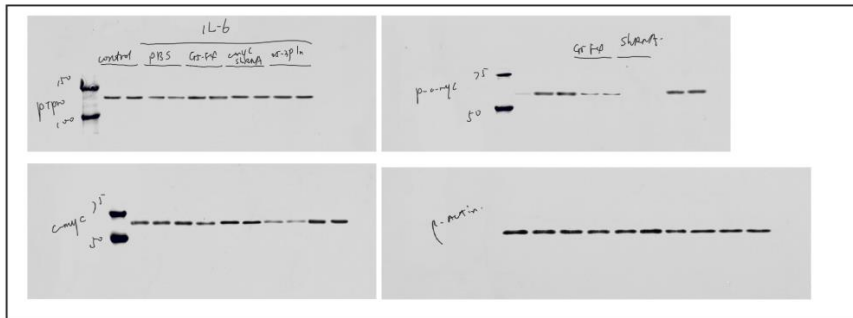

Figure 5h

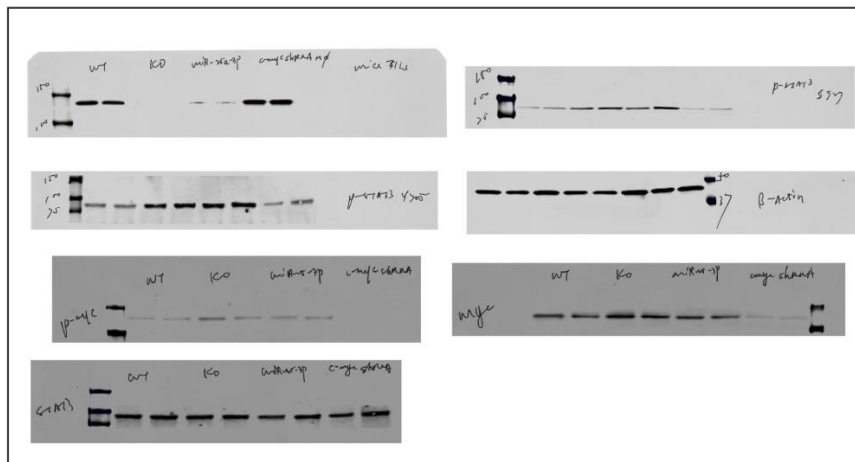

Figure 6d

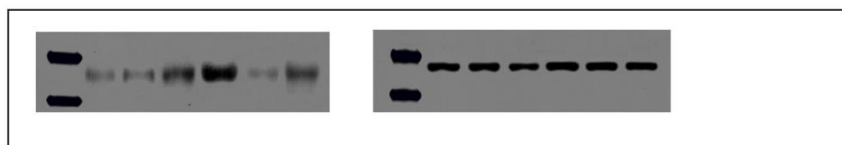

Figure s7 A C

Uncropped figure of WB

Figure s16
